# Supplementary material for: Do family and neighbourhood matter in secondary school completion? A multilevel study of determinants and their interactions in a life-course perspective
Source: PLOS journal article supplement (doi:10.1371/journal.pone.0172281), 2017-02-21
Supplement: S5 (10.1371/journal.pone.0172281.s005) [file journal.pone.0172281.s005]

**S5 Table** Paternal unemployment and low parental education level as risk factors for non-completion of secondary education: single effects of both exposures, joint effects when using one reference category, and measures of interaction on additive scale.

|                                                | Estimate | 95 % confidence interval |             |
|------------------------------------------------|----------|--------------------------|-------------|
|                                                |          | Lower limit              | Upper limit |
| Odds ratios representing single effects        |          |                          |             |
| Paternal employment                            | 1 (ref)  |                          |             |
| Paternal unemployment                          | 1.90     | 1.83                     | 1.97        |
| High education level                           | 1 (ref)  |                          |             |
| Low education level                            | 2.26     | 2.19                     | 2.33        |
| Odds ratios representing joint effects         |          |                          |             |
| Paternal employment and high education level   | 1 (ref)  |                          |             |
| Paternal unemployment and high education level | 1.93     | 1.84                     | 2.03        |
| Paternal employment and low education level    | 2.28     | 2.20                     | 2.35        |
| Paternal unemployment and low education level  | 4.18     | 3.94                     | 4.44        |
| Measures of interaction on additive scale      |          |                          |             |
| RERI                                           | 0.97     |                          |             |
| AP                                             | 0.23     |                          |             |
| S                                              | 1.44     |                          |             |
